# Supplementary material for: X-Linked G6PD Deficiency Protects Hemizygous Males but Not Heterozygous Females against Severe Malaria
Source: PLOS journal article supplement (doi:10.1371/journal.pmed.0040066), 2007-03-08
Supplement: S1 (10.1371/journal.pmed.0040066.s001) [file journal.pmed.0040066.s001]

|  | Number of cases (%), by sex and G6PD genotype) | | | | | |
| --- | --- | --- | --- | --- | --- | --- |
|  | Male | |  | Female | | |
|  | Hemizygous | Normal |  | Heterozygous | Homozygous | Normal |
| The Gambia |  |  |  |  |  |  |
| Severe malaria | 4  (1.4) | 275  (98.6) |  | 17  (6.7) | 0  (0.0) | 238  (93.3) |
| Uncomplicated malaria | 5  (2.7) | 177  (97.3) |  | 15  (9.1) | 0  (0.0) | 150  (90.9) |
| Kenya |  |  |  |  |  |  |
| Severe malaria | 13  (11.1) | 104  (88.9) |  | 25  (18.3) | 4  (2.9) | 108  (78.8) |
| Uncomplicated malaria | 19  (14.3) | 114  (85.7) |  | 20  (16.8) | 3  (2.5) | 96  (80.7) |
|  |  |  |  |  |  |  |
| Stratified analysis |  |  |  |  |  |  |
| Pooled OR (95% CI) | 0.68  (0.33–1.39) |  |  | 0.91  (0.55–1.53) | 1.19*  (0.20–8.29) |  |
| *P* value | 0.32 |  |  | 0.71 | > 0.999 |  |

* OR for Kenya group only as no homozygotes with malaria were reported from The Gambia.
